# Supplementary material for: Microbiota and Metabolite Profiles in the Feces of Juvenile Sika Deer (Cervus nippon) from Birth to Weaning
Source: MDPI journal article supplement (doi:10.3390/ani14030432), 2024-01-29
Supplement: s1 [file s1]

**Table S1.** The significantly different bacterial genera (relative abundances) in the feces of juvenile sika deer among different age-groups.

| Genera                                     | Average relative abundances |                       |                      | SEM   | P value |
|--------------------------------------------|-----------------------------|-----------------------|----------------------|-------|---------|
|                                            | D1                          | D42                   | D70                  |       |         |
| <i>Phocaeicola</i>                         | 0.17 <sup>b</sup>           | 2.04 <sup>ab</sup>    | 2.62 <sup>a</sup>    | 0.004 | 0.017   |
| <i>Alloprevotella</i>                      | 0.18 <sup>b</sup>           | 2.39 <sup>a</sup>     | 0.27 <sup>ab</sup>   | 0.005 | 0.044   |
| <i>Alistipes</i>                           | 0.28 <sup>b</sup>           | 1.80 <sup>ab</sup>    | 2.57 <sup>a</sup>    | 0.003 | 0.014   |
| Rikenellaceae RC9                          | 0.74 <sup>Bb</sup>          | 4.40 <sup>ABab</sup>  | 6.51 <sup>Aa</sup>   | 0.008 | 0.005   |
| <i>Bacillus</i>                            | 13.10                       | 0.50                  | 0.33                 | 0.030 | 0.048   |
| <i>Lactobacillus</i>                       | 4.72 <sup>Aa</sup>          | 0.48 <sup>ABab</sup>  | 0.01 <sup>Bb</sup>   | 0.010 | 0.007   |
| <i>Lactococcus</i>                         | 9.70 <sup>a</sup>           | 0.33 <sup>ab</sup>    | 0.23 <sup>b</sup>    | 0.022 | 0.033   |
| Christensenellaceae R-7                    | 0.63 <sup>Bb</sup>          | 3.78 <sup>ABab</sup>  | 4.20 <sup>Aa</sup>   | 0.005 | 0.007   |
| <i>Lachnoclostridium</i>                   | 3.55 <sup>a</sup>           | 0.01 <sup>b</sup>     | 0.02 <sup>ab</sup>   | 0.006 | 0.015   |
| Lachnospiraceae NK4A136                    | 0.66 <sup>Bb</sup>          | 3.77 <sup>Aa</sup>    | 1.75 <sup>ABab</sup> | 0.004 | 0.011   |
| Ruminococcaceae Other                      | 0.47 <sup>Bb</sup>          | 2.59 <sup>ABab</sup>  | 3.67 <sup>Aa</sup>   | 0.004 | 0.011   |
| Ruminococcaceae UCG-005                    | 2.20 <sup>Bb</sup>          | 15.35 <sup>ABab</sup> | 18.23 <sup>Aa</sup>  | 0.021 | 0.007   |
| Ruminococcaceae UCG-010                    | 0.62 <sup>b</sup>           | 5.11 <sup>a</sup>     | 6.59 <sup>a</sup>    | 0.008 | 0.008   |
| Ruminococcaceae UCG-014                    | 0.28 <sup>b</sup>           | 2.60 <sup>a</sup>     | 1.21 <sup>ab</sup>   | 0.005 | 0.023   |
| <i>Eubacterium coprostanoligenes</i> group | 0.86 <sup>b</sup>           | 4.30 <sup>a</sup>     | 3.19 <sup>a</sup>    | 0.005 | 0.013   |
| <i>Breznakia</i>                           | 0.00                        | 0.01                  | 0.01                 | 0.000 | 0.042   |
| <i>Fusobacterium</i>                       | 4.47 <sup>Aa</sup>          | 0.00 <sup>Bb</sup>    | 0.00 <sup>ABb</sup>  | 0.010 | 0.003   |

SEM Standard error of the mean. a, b, c, A, B, C values within a row, different letters denote differences among different groups ( $P < 0.05$ ,  $P < 0.01$ ).

**Table S2.** The classification and proportion of identified metabolites.

| Metabolites    | Number | Proportions |
|----------------|--------|-------------|
| Fatty acids    | 13     | 9.49        |
| Amino acids    | 30     | 21.90       |
| Amines         | 5      | 3.65        |
| Organic acids  | 3      | 2.19        |
| Purines        | 7      | 5.11        |
| Pyrimidines    | 3      | 2.19        |
| Sugars         | 20     | 14.60       |
| Sugar alcohols | 6      | 4.38        |

**Table S3.** Metabolic pathway enrichment analysis based on shared metabolites among the three age-groups.

| Metabolites        | Concentrations |       |       | Fold change |         |          |
|--------------------|----------------|-------|-------|-------------|---------|----------|
|                    | D1             | D42   | D70   | D1vsD42     | D1vsD70 | D42vsD70 |
| Myo-inositol       | 1.287          | 0.818 | 0.889 | 1.574       | 1.448   | 0.919    |
| Myristic acid      | 0.759          | 0.968 | 0.809 | 0.784       | 0.938   | 1.197    |
| Urea               | 0.539          | 0.588 | 0.278 | 0.917       | 1.936   | 2.111    |
| Glycerol           | 0.166          | 0.193 | 0.276 | 0.860       | 0.601   | 0.699    |
| Heptadecanoic acid | 1.612          | 1.034 | 0.182 | 1.560       | 8.860   | 5.680    |
| Lauric acid        | 0.136          | 0.245 | 0.171 | 0.554       | 0.792   | 1.430    |
| Alanine            | 0.374          | 0.306 | 0.169 | 1.222       | 2.216   | 1.813    |
| Oxamic acid        | 0.106          | 0.081 | 0.162 | 1.317       | 0.654   | 0.497    |
| Putrescine         | 1.648          | 0.853 | 0.139 | 1.933       | 11.821  | 6.117    |

|                          |       |       |       |       |        |        |
|--------------------------|-------|-------|-------|-------|--------|--------|
| Lignoceric acid          | 0.168 | 0.148 | 0.137 | 1.136 | 1.225  | 1.079  |
| Behenic acid             | 0.277 | 0.184 | 0.098 | 1.506 | 2.829  | 1.878  |
| N-acetyl-D-galactosamine | 0.099 | 0.085 | 0.088 | 1.158 | 1.117  | 0.965  |
| 2,6-diaminopimelic acid  | 0.033 | 0.076 | 0.081 | 0.439 | 0.414  | 0.943  |
| Arachidonic acid         | 0.053 | 0.026 | 0.071 | 2.049 | 0.748  | 0.365  |
| Hypoxanthine             | 0.098 | 0.029 | 0.065 | 3.352 | 1.505  | 0.449  |
| Tyrosine                 | 0.050 | 0.095 | 0.060 | 0.527 | 0.838  | 1.591  |
| Palmitoleic acid         | 0.037 | 0.026 | 0.049 | 1.443 | 0.753  | 0.522  |
| 3-hydroxypropionic acid  | 0.022 | 0.018 | 0.046 | 1.209 | 0.486  | 0.402  |
| Glutaric acid            | 0.008 | 0.023 | 0.043 | 0.372 | 0.198  | 0.533  |
| Oxalic acid              | 0.050 | 0.040 | 0.042 | 1.252 | 1.201  | 0.959  |
| Glycolic acid            | 0.022 | 0.032 | 0.035 | 0.677 | 0.631  | 0.932  |
| 2'-deoxyguanosine        | 0.018 | 0.011 | 0.033 | 1.608 | 0.531  | 0.331  |
| 3,6-anhydro-D-galactose  | 0.029 | 0.026 | 0.032 | 1.122 | 0.910  | 0.811  |
| Arachidic acid           | 0.075 | 0.050 | 0.032 | 1.517 | 2.361  | 1.557  |
| D-(glycero1 1-phosphate) | 0.028 | 0.023 | 0.029 | 1.221 | 0.975  | 0.798  |
| 2-monoolein              | 0.029 | 0.018 | 0.027 | 1.620 | 1.084  | 0.669  |
| Fucose                   | 0.025 | 0.031 | 0.027 | 0.827 | 0.955  | 1.155  |
| L-cysteine               | 0.028 | 0.015 | 0.025 | 1.934 | 1.132  | 0.586  |
| D-galacturonic acid      | 0.054 | 0.031 | 0.024 | 1.750 | 2.198  | 1.256  |
| 3-hydroxybutyric acid    | 0.012 | 0.012 | 0.024 | 1.024 | 0.519  | 0.506  |
| 6-phosphogluconic acid   | 0.013 | 0.008 | 0.022 | 1.583 | 0.574  | 0.363  |
| Thymine                  | 0.013 | 0.015 | 0.021 | 0.849 | 0.606  | 0.714  |
| Lactamide                | 0.016 | 0.026 | 0.020 | 0.625 | 0.790  | 1.264  |
| Lactate                  | 0.259 | 0.387 | 0.019 | 0.668 | 13.978 | 20.916 |
| Threonine                | 0.026 | 0.017 | 0.018 | 1.537 | 1.414  | 0.920  |
| Serine                   | 0.029 | 0.015 | 0.018 | 1.885 | 1.578  | 0.837  |
| Glutamic acid            | 0.026 | 0.014 | 0.016 | 1.845 | 1.618  | 0.877  |
| Pyruvic acid             | 0.009 | 0.013 | 0.016 | 0.671 | 0.539  | 0.803  |
| Maleic acid              | 0.008 | 0.008 | 0.016 | 0.929 | 0.486  | 0.524  |
| Phenylalanine            | 0.023 | 0.009 | 0.015 | 2.566 | 1.591  | 0.620  |
| 2,3-dihydropyridine      | 0.010 | 0.008 | 0.014 | 1.182 | 0.729  | 0.617  |
| Tetrahydrocorticosterone | 0.034 | 0.020 | 0.012 | 1.674 | 2.940  | 1.756  |
| Digitoxose               | 0.014 | 0.007 | 0.012 | 2.212 | 1.252  | 0.566  |
| Beta-alanine             | 0.012 | 0.033 | 0.010 | 0.350 | 1.129  | 3.229  |
| Galactonic acid          | 0.008 | 0.007 | 0.008 | 1.116 | 1.011  | 0.907  |
| Pantothenic acid         | 0.004 | 0.002 | 0.008 | 1.565 | 0.476  | 0.304  |
| O-methylthreonine        | 0.021 | 0.014 | 0.008 | 1.504 | 2.691  | 1.790  |
| Fumaric acid             | 0.004 | 0.006 | 0.008 | 0.613 | 0.444  | 0.725  |
| Nicotianamine            | 0.008 | 0.007 | 0.008 | 1.218 | 1.038  | 0.852  |
| D-glyceric acid          | 0.003 | 0.003 | 0.008 | 1.197 | 0.440  | 0.368  |
| Biotin                   | 0.008 | 0.008 | 0.008 | 1.084 | 1.077  | 0.993  |
| Diglycerol               | 0.008 | 0.011 | 0.007 | 0.758 | 1.124  | 1.484  |
| Alpha-ketoglutaric acid  | 0.001 | 0.007 | 0.008 | 0.175 | 0.145  | 0.828  |
| N-carbamylglutamate      | 0.004 | 0.002 | 0.006 | 1.944 | 0.641  | 0.330  |
| Pelargonic acid          | 0.004 | 0.005 | 0.006 | 0.773 | 0.663  | 0.857  |
| Galactinol               | 0.021 | 0.023 | 0.006 | 0.944 | 3.583  | 3.796  |
| 21-hydroxypregnenolone   | 0.011 | 0.005 | 0.006 | 2.497 | 1.982  | 0.794  |
| Methyl phosphate         | 0.003 | 0.003 | 0.006 | 1.095 | 0.566  | 0.517  |
| Erythrose                | 0.008 | 0.008 | 0.005 | 1.084 | 1.687  | 1.556  |

|                            |       |       |       |       |         |         |
|----------------------------|-------|-------|-------|-------|---------|---------|
| 20alpha-hydroxycholesterol | 0.009 | 0.007 | 0.004 | 1.223 | 1.962   | 1.605   |
| Cerotinic acid             | 0.003 | 0.034 | 0.004 | 0.077 | 0.607   | 7.873   |
| Aminomalonic acid          | 0.003 | 0.003 | 0.003 | 0.868 | 0.849   | 0.978   |
| Inosine                    | 0.018 | 0.019 | 0.003 | 0.942 | 6.397   | 6.789   |
| O-acetylserine             | 0.002 | 0.002 | 0.003 | 1.389 | 0.844   | 0.608   |
| Threonic acid              | 0.002 | 0.002 | 0.002 | 1.035 | 0.749   | 0.724   |
| Threitol                   | 0.205 | 0.194 | 0.002 | 1.055 | 121.454 | 115.091 |
| Maleamate                  | 0.002 | 0.002 | 0.002 | 1.194 | 1.248   | 1.045   |
